# Supplementary material
Source: PubMed Central journal article supplement (PMC3816454)
Supplement: 1316796110_pnas.201316796SI.pdf [file 1316796110_pnas.201316796SI.pdf]

# Supporting Information

Sugiyama et al. 10.1073/pnas.1316796110

## SI Materials and Methods

**Antibodies.** BD Horizon V500 (V500)-conjugated anti-CD8 (RPA-T8) mAb, FITC-conjugated anti-CD45RA (HI100) mAb, allophycocyanin-cyanine7 (APC-Cy7)-conjugated anti-CD14 (MφP9) mAb, biotin-conjugated anti-CD194 (C-C chemokine receptor 4, CCR4) (1G1) mAb, phycoerythrin-cyanine7 (PE-Cy7)-conjugated anti-CD4 (SK3) mAb and purified anti-CD25 (M-A251, no azide/low endotoxin) mAb were purchased from BD Biosciences. Alexafluor 700-conjugated anti-CD3 (OKT3) mAb, PE-Cy7-conjugated anti-CD16 (eBioCB16) mAb, APC-conjugated anti-CD56 (MEM188) mAb, PE-Cy7-conjugated TNF- $\alpha$  (MAB11) mAb, PE-conjugated anti-FOXP3 (Forkhead Box P3, 236A/E7) mAb, PE-conjugated anti-IFN- $\gamma$  (4S.B3) mAb, and eFluor 780-conjugated fixable viability dye were purchased from eBioscience. PE-conjugated CD19 (HIB19) mAb, peridinin chlorophyll protein complex-cyanine5.5 (PerCP-Cy5.5)-conjugated CD11c (3.9) mAb, Brilliant violet 421-conjugated streptavidin and biotin-conjugated CD25 (BC96) mAb were obtained from BioLegend. Purified anti-CCR4 mAb (KM2160) was kindly provided by Kyowa Hakko Kirin (Shizuoka, Japan).

**Peptides.** Synthetic peptides of NY-ESO-1<sub>1-20</sub> (MQAEGRGTGGSTGDADGPGG), NY-ESO-1<sub>11-30</sub> (STGDADGPGGPGIPD-GPGGN), NY-ESO-1<sub>21-40</sub> (PGIPDGPGGNAGGPGGAGAT), NY-ESO-1<sub>31-50</sub> (AGGPGGAGATGGRGPRGAGA), NY-ESO-1<sub>41-60</sub> (GGRGPRGAGAARASGPGGGA), NY-ESO-1<sub>51-70</sub> (ARASGPGGAPRGPHGGAAS), NY-ESO-1<sub>61-80</sub> (PRGPHGGAASGLNGCCRCGA), NY-ESO-1<sub>71-90</sub> (GLNGCCRCGARGPESRLLF), NY-ESO-1<sub>81-100</sub> (RGPESRLLFYLAMPFATPM), NY-ESO-1<sub>91-110</sub> (YLAMPFATPMEAEARRSLA), NY-ESO-1<sub>101-120</sub> (EAELARRSLAQDAPPLVPG), NY-ESO-1<sub>111-130</sub> (QDAPPLVPGVLLKEFTVSG), NY-ESO-1<sub>119-143</sub> (PGVLLKEFTVSGNILTIRLTAADHR), NY-ESO-1<sub>131-150</sub> (NILTIRLTAADHRQLQLSIS), NY-ESO-1<sub>139-160</sub> (AADHRQLQLSISCLQQLSLLM), NY-ESO-1<sub>151-170</sub> (SCLQQLSLLMWITQCFLPVF), NY-ESO-1<sub>161-180</sub> (WITQCFLPVFLAQPPSGQRR), NY-ESO-1<sub>187-98</sub> (LLEFYLAMPFAT), NY-ESO-1<sub>121-132</sub> (VLLKEFTYSGNI), NY-ESO-1<sub>143-154</sub> (RQLQLSISCLQ), NY-ESO-1<sub>157-170</sub> (SLLMWITQCFLPVF), NY-ESO-1<sub>157-165</sub> (SLLMWITQC), NY-ESO-1<sub>92-100</sub> (LAMPFATPM) were obtained from Invitrogen.

**In Vitro Sensitization of NY-ESO-1-Specific CD4<sup>+</sup> T Cells.** CD8<sup>+</sup> T cells were depleted from peripheral blood mononuclear cells (PBMCs) with CD8 Microbeads (Miltenyi Biotec). The remaining cells were subjected to negative selection of CD4<sup>+</sup> T cells with CD4<sup>+</sup> T Cell Isolation Kit (Miltenyi Biotec). These CD4<sup>+</sup> T cells were further separated into CD4<sup>+</sup>CD25<sup>-</sup> or CD4<sup>+</sup>CCR4<sup>-</sup> T cells. CD4<sup>-</sup>CD8<sup>-</sup> cells were used as antigen-presenting cells (APCs) after pulsing with pooled peptides (10  $\mu$ M) overnight at 37 °C. After irradiation (35 Gy), 3–5  $\times$  10<sup>5</sup> APCs were added to cultures containing 1–3  $\times$  10<sup>5</sup> CD4<sup>+</sup> T cells, and were fed with IL-2 (10 U/mL; Roche Diagnostics) and IL-7 (20 ng/mL; R&D Systems) in round-bottom 96-well plates (Thermo Fisher Scientific). Subsequently, one-half of the medium was replaced by fresh medium containing IL-2 (20 U/mL) and IL-7 (40 ng/mL) twice per week.

**Enzyme-Linked Immunospot Assay.** Flat-bottomed, 96-well nitrocellulose plates (MAHAS4510; Millipore) were coated with anti-IFN- $\gamma$  mAb (4  $\mu$ g/mL, 1-D1K; MABTECH) and incubated overnight at 4 °C and washed and blocked with RPMI with 10% (vol/vol) FCS. Presensitized 2–5  $\times$  10<sup>4</sup> CD4<sup>+</sup> T cells and 5  $\times$  10<sup>4</sup> target cells (peptide-pulsed autologous activated-T-cell APCs, or protein-pulsed dendritic cells, DCs) were added to each well and incubated for 20–22 h at 37 °C. Spots were developed using biotinylated anti-IFN- $\gamma$  mAb (0.2  $\mu$ g/mL, 7-B6-1-biotin; MABTECH), alkaline phosphatase conjugated streptavidin (Roche Diagnostics) and 5-bromo-4-chloro-3-indolyl phosphate/nitroblue tetrazolium (Sigma) and counted with a C. T. L. Immunospot S5 Micro Analyzer (Cellular Technologies).

**Tetramer Assay.** Presensitized CD8<sup>+</sup> T cells were stained with PE-labeled HLA-A\*0201 HLA-B\*3501 or Cw\*0304/NY-ESO-1 tetramer for 10 min at 37 °C before additional staining with cell surface markers for 15 min at 4 °C. After washing, results were analyzed by flow cytometry and FlowJo v9.6.2 software.

**Preparation of DCs.** CD14<sup>+</sup> cells were isolated from PBMCs using CD14 Microbeads (Miltenyi Biotec). Next, 1  $\times$  10<sup>6</sup> CD14<sup>+</sup> cells were cultured in X-VIVO 15 (Lonza) with IL-4 (20 ng/mL) and GM-CSF (20 ng/mL, R&D) in 37 °C. One-half of the medium was replaced by fresh medium containing IL-4 (40 ng/mL) and GM-CSF (40 ng/mL) at day 3 and day 5. Cells were collected 6 d later and used as DCs.

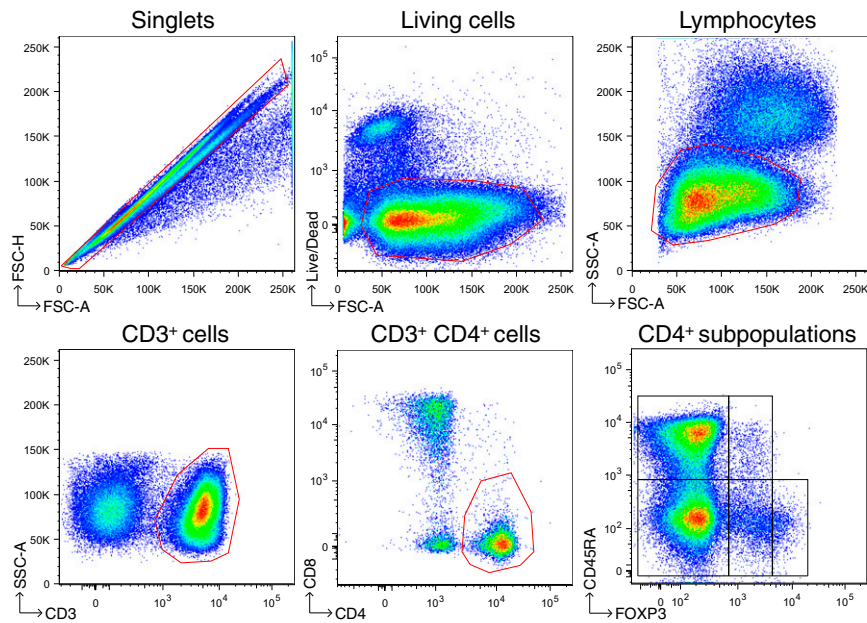

**Fig. S1.** Flow cytometric analysis of one representative healthy donor with detailed gating strategy. Staining for CD4<sup>+</sup> T-cell subpopulation based on the expression of CD45RA and FOXP3. Singlets were identified by exclusion of doublets using an FSC-A vs. FSC-H plot. Within the singlets living lymphocytes were identified by gating live/dead marker negative cells, and lymphocytes were defined by gating as a FSC-A vs. SSC-A plot. Then, gates were set on CD3<sup>+</sup> cells and CD3<sup>+</sup>CD4<sup>+</sup> cells, and CD45RA and FOXP3 stained cells were visualized to identify each CD4<sup>+</sup> T-cell subpopulation.

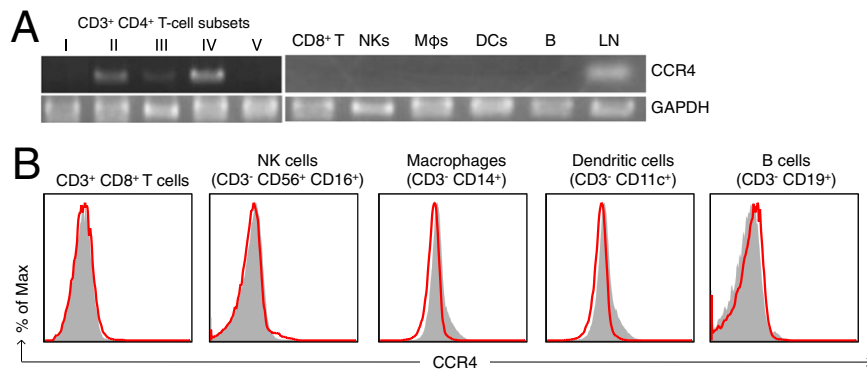

**Fig. S2.** CCR4 expression in T cells, NK cells, macrophage/monocytes, DCs, and B cells. (A) RT-PCR for CCR4 mRNA of CD4<sup>+</sup> T-cell subpopulation, CD8<sup>+</sup> T cells, NK cells, macrophage/monocytes, DCs, and B cells in PBMCs from three healthy donors (cDNA of lymph node was used as a positive control). Total RNA was isolated from cells with RNeasy Micro Kit (Qiagen). cDNA was synthesized from 0.2 μg of total RNA using a SuperScript III reverse-transcriptase kit (Invitrogen) and the Oligo (dT) primer in a total volume of 40 μL. cDNA was amplified in a final volume of 25 μL containing 10 μM of each CCR4 primer (sense, 5'-TTCCTCAGAGCCGCTTCAG-3'; antisense, 5'-CATCGAGGGTGGTGTCTGCTAT-3') and 0.125 μL of Ex-Taq polymerase (TaKaRa Bio) according to the instructions provided by the manufacturer. (B) PBMCs from three healthy donors were stained for cell type-specific markers and CCR4 expression by each cell population was analyzed by flow cytometry. Representative data from a healthy donor are shown. These experiments were performed at least twice with similar results.
